# Supplementary material for: Regional and temporal variations of spontaneous coronary artery dissection care according to consensus recommendations: a systematic review and meta-analysis
Source: PubMed Central journal article supplement — Open Heart. 2023 Dec 6;10(2):e002379. doi: 10.1136/openhrt-2023-002379 (PMC10711887; doi:10.1136/openhrt-2023-002379), 2023-12-06
Supplement: openhrt-2023-002379supp001.pdf [file openhrt-2023-002379supp001.pdf]

Table 1 - Search queries

| Database | Search query                                                                                                         | Date       | Results |
|----------|----------------------------------------------------------------------------------------------------------------------|------------|---------|
| MEDLINE  | 1 - spontaneous coronary artery dissection.mp.<br>2 - spontaneous coronary dissection.mp.<br>3 - 1 OR 2              | 16/06/2022 | 1528    |
| EMBASE   | spontaneous coronary artery dissection OR spontaneous coronary dissection                                            | 15/06/2022 | 2297    |
| SCOPUS   | TITLE-ABS-KEY ( "spontaneous coronary artery dissection" )<br>OR TITLE-ABS-KEY ( "spontaneous coronary dissection" ) | 16/06/2022 | 1577    |
| CINAHL   | S1 - spontaneous coronary artery dissection<br>S2 - spontaneous coronary dissection<br>S3 - S1 OR S4                 | 16/06/2022 | 645     |

Table 2 – Risk of bias assessments using New Castle-Ottawa Scale

| Author           | Year | Selection 1 | Selection 2 | Selection 3 | Selection 4 | Comparability | Outcome 1 | Outcome 2 | Outcome 3 |
|------------------|------|-------------|-------------|-------------|-------------|---------------|-----------|-----------|-----------|
| Daoulah          | 2021 | *           | *           |             | *           |               | *         | *         |           |
| McGrath-Cadell   | 2016 | *           | *           | *           | *           |               | *         | *         | *         |
| Rashid           | 2016 | *           |             | *           |             |               | *         | *         | *         |
| Adams            | 2018 |             | *           |             | *           | *             | *         | *         | *         |
| Tarr             | 2022 | *           |             | *           |             | *             | *         | *         |           |
| Chou             | 2016 |             |             | *           |             |               | *         | *         |           |
| Bouchard         | 2021 |             |             | *           |             |               | *         |           |           |
| Inohara          | 2021 | *           | *           | *           | *           | **            | *         | *         |           |
| Solomonica       | 2020 | *           | *           | *           | *           |               | *         | *         |           |
| Saw              | 2019 | *           | *           | *           | *           | *             | *         | *         |           |
| Sun              | 2019 | *           |             | *           |             | *             | *         | *         |           |
| Hui              | 2020 | *           | *           | *           | *           | **            | *         | *         |           |
| Chang            | 2022 | *           | *           | *           |             |               | *         | *         | *         |
| Mortensen        | 2009 | *           | *           | *           |             |               | *         | *         | *         |
| Combaret         | 2021 | *           | *           | *           |             |               | *         | *         |           |
| Panneerselvam    | 2017 | *           | *           | *           |             |               | *         | *         | *         |
| Almasi           | 2022 | *           | *           | *           | *           |               | *         | *         |           |
| Lettieri         | 2015 | *           | *           | *           | *           |               | *         | *         |           |
| Antonutti        | 2021 | *           | *           | *           | *           | *             | *         | *         |           |
| Solinas          | 2022 | *           | *           | *           |             |               | *         | *         |           |
| Cerrato          | 2021 | *           | *           | *           | *           |               | *         | *         | *         |
| Nakashima        | 2016 | *           | *           | *           | *           |               | *         | *         | *         |
| Nishiguchi       | 2017 |             | *           | *           |             |               | *         | *         |           |
| Inohara          | 2020 | *           | *           | *           | *           |               | *         | *         |           |
| Inoue            | 2021 | *           | *           | *           |             |               | *         | *         | *         |
| Kim              | 2021 | *           | *           | *           | *           |               | *         | *         | *         |
| McAlister        | 2021 | *           | *           | *           | *           |               | *         | *         | *         |
| Romero-Rodriguez | 2010 | *           | *           | *           |             |               | *         | *         | *         |
| Alfonso          | 2012 | *           | *           | *           | *           |               | *         | *         |           |

|                  |      |   |   |   |   |    |   |   |   |
|------------------|------|---|---|---|---|----|---|---|---|
| Alfonso          | 2012 | * | * | * | * |    | * | * | * |
| Camacho Freire   | 2019 | * | * | * | * | ** | * | * | * |
| Bastante         | 2020 | * | * | * | * |    | * | * | * |
| Macaya           | 2020 | * | * | * | * | ** | * | * | * |
| Mori             | 2020 | * | * | * | * | ** | * | * |   |
| Garcia-Guimaraes | 2022 | * | * | * | * | *  | * | * | * |
| Murugiah         | 2022 | * | * | * | * | ** | * | * |   |
| Wilander         | 2022 | * | * | * | * |    | * | * | * |
| Seidl            | 2021 | * | * | * | * |    | * | * |   |
| Smaardijk        | 2020 | * |   | * |   |    | * | * |   |
| Carss            | 2020 | * |   | * |   | *  | * | * |   |
| Androulakis      | 2022 |   |   | * |   | ** | * | * |   |
| Kotecha          | 2021 | * | * | * | * | *  | * | * | * |
| De Maio Jr       | 1989 |   |   | * |   |    | * | * | * |
| Liang            | 2014 | * |   | * |   |    | * | * |   |
| Wagers           | 2018 |   |   |   |   |    |   | * |   |
| Clare            | 2019 | * |   | * | * | *  | * | * | * |
| Sharma           | 2019 | * |   | * |   |    | * | * |   |
| McNair           | 2020 | * | * | * | * |    | * | * | * |
| Turley           | 2020 | * |   | * |   |    | * | * |   |
| Chen             | 2021 | * | * | * | * | *  | * | * | * |
| Baechler         | 2022 | * |   | * |   |    | * | * |   |
| Johnson          | 2022 | * |   | * |   |    | * |   |   |
| White Solaru     | 2019 |   |   | * | * |    | * |   | * |
